# Supplementary material
Source: Springer Nature journal article supplement (https://www.springermedizin.de/resource/supplementary/12913_2013_2958_MOESM1_ESM.pdf/9531978)
Supplement: MOESM1 [file 9531978]

Assessed for eligibility (n= 178)

Excluded n =(25)

- Not meeting inclusion criteria (n = 14)
- Declined to participate (n = 11)

Randomized (n =153)

Parenting Group

Waiting-list Control

Allocated for intervention (n = 104)

- Received allocated intervention (n = 86)
- Did not receive allocated intervention (n = 18)

Reason(s) :

- Formally withdrew before intervention (n = 9)
- Could not be contacted at follow-up (n = 9)

Allocated for intervention (n = 49)

- Received allocated intervention (n = 47)
- Did not receive allocated intervention (n = 2)

Reason(s) :

- Formally withdrew before follow-up(n = 1)
- Could not be contacted at follow-up (n = 1)

Lost to follow up (n = 19)

Reason(s) :

- Lost to Follow Up 3-could not be contacted (n = 19)

Discontinued intervention (n =0)

Lost to follow up (n = 0)

Discontinued intervention (n =0)

Analysed (n =75)

Excluded from analysis (n =11)

Reason(s) :

- Economic data missing (n = 11)

Analysed (n =44)

Excluded from analysis (n = 3)

Reason(s) :

- Economic data missing (n = 3)
